# Supplementary material
Source: PubMed Central journal article supplement (PMC6312852)
Supplement: NIHMS1001635-supplement-1.pdf [file NIHMS1001635-supplement-1.pdf]

**Supplemental Material.****Table 1.** Dimensions of Quality Improvement Activities

| <b>Dimension (k)</b> | <b>Item Text</b>                                                                         | <b>Response Scale<sup>a</sup></b> |
|----------------------|------------------------------------------------------------------------------------------|-----------------------------------|
| Infrastructure (8)   | Chronic disease registries                                                               | Use                               |
|                      | Clinical (improvement) collaboratives                                                    | Use                               |
|                      | Planned care for chronic illness (Wagner's chronic disease model)                        | Use                               |
|                      | Shared clinical governance by nurses and physicians                                      | Use                               |
|                      | Case manager, social worker or other clinical staff to coordinate or manage patient care | Use                               |
|                      | Going on multidisciplinary rounds                                                        | Use                               |
|                      | Evidence-based practice guidelines/clinical pathways                                     | Use                               |
|                      | Disease-specific or condition-specific improvement projects                              | Use                               |
| Prevention (10)      | Taking actions to prevent central line infections                                        | Use                               |
|                      | Taking actions to prevent decubitus ulcers                                               | Use                               |
|                      | Taking actions to prevent surgical site infections                                       | Use                               |

| Dimension (k)                | Item Text                                                                                                      | Response Scale <sup>a</sup> |
|------------------------------|----------------------------------------------------------------------------------------------------------------|-----------------------------|
|                              | Taking actions to prevent ventilator-associated pneumonia                                                      | Use                         |
|                              | Taking actions to prevent falls                                                                                | Use                         |
|                              | Order sets                                                                                                     | Use                         |
|                              | Rapid response teams                                                                                           | Use                         |
|                              | Taking actions to prevent adverse drug events                                                                  | Use                         |
|                              | Medication reconciliation                                                                                      | Use                         |
|                              | Pharmacists placed in patient care units                                                                       | Use                         |
| Information Gathering<br>(9) | Work process redesign or re-engineering (e.g. Six Sigma or Lean or Rapid Process Improvement Workshops (RPIW)) | Use                         |
|                              | Activities to improve workforce recruitment, retention, and development                                        | Use                         |
|                              | Benchmarking within the hospital                                                                               | Use                         |
|                              | Benchmarking with other hospitals                                                                              | Use                         |
|                              | Learning best practices from other industries                                                                  | Use                         |
|                              | Patient flow improvement strategies                                                                            | Use                         |

| Dimension (k)                    | Item Text                                                                                                                                              | Response Scale <sup>a</sup> |
|----------------------------------|--------------------------------------------------------------------------------------------------------------------------------------------------------|-----------------------------|
|                                  | Patient advisory groups                                                                                                                                | Use                         |
|                                  | Profiling of individual provider performance                                                                                                           | Use                         |
|                                  | Management 'walk-arounds' to identify quality problems or issues                                                                                       | Use                         |
| Goal                             | A clear sense of direction exists among the senior leadership (Quadrad) at this facility.                                                              | Agree                       |
| Alignment/Quality Commitment (4) | Goals of senior leadership at the facility (Quadrad) level and the inpatient medicine service are aligned.                                             | Agree                       |
|                                  | This facility is committed to the highest quality patient care.                                                                                        | Agree                       |
|                                  | How much agreement do you perceive between the goals of senior leadership at the facility (Quadrad) level and those of the inpatient medicine service? | Extent                      |

<sup>13a</sup>All items used 5-point Likert-type response scales as follows:

**Use.** 0 = Not used at all/1 = Used minimally/2 = Used moderately/3 = Used Widely/4 = Used Hospital-Wide. A "Don't know/not sure" option was also available; this was scored as missing data

**Agree.** 1 = Strongly disagree/2 = Disagree/3 = Neither agree nor disagree/4 = Agree/5  
= Strongly Agree

**Extent.** 1 = No or almost no agreement/2 = A little agreement/3 = Some agreement/4 =  
A great deal of agreement/5 = Complete or almost complete agreement
